# Supplementary material
Source: publisher figshare collection journal article supplement (https://acs.figshare.com/ndownloader/files/3891769)
Supplement: Supplementary file 1 [file 3891769]

Supplementary Information for

# Fabrication of SiO<sub>2</sub>/TiO<sub>2</sub> Double-Shelled Hollow Nanospheres with Controllable Size via Sol-Gel Reaction and Sonication-Mediated Etching

*Jungsup Lee, Sun Hye Hwang, Juyoung Yun, and Jyongsik Jang\**

School of Chemical and Biological Engineering,

Seoul National University, 599 Gwanangno, Gwanakgu, Seoul 151-742, Korea

[\*] Prof. Jyongsik Jang

School of Chemical and Biological Engineering,

Seoul National University, 599 Gwanangno, Gwanakgu, Seoul 151-742, Korea

E-mail: jsjang@plaza.snu.ac.kr

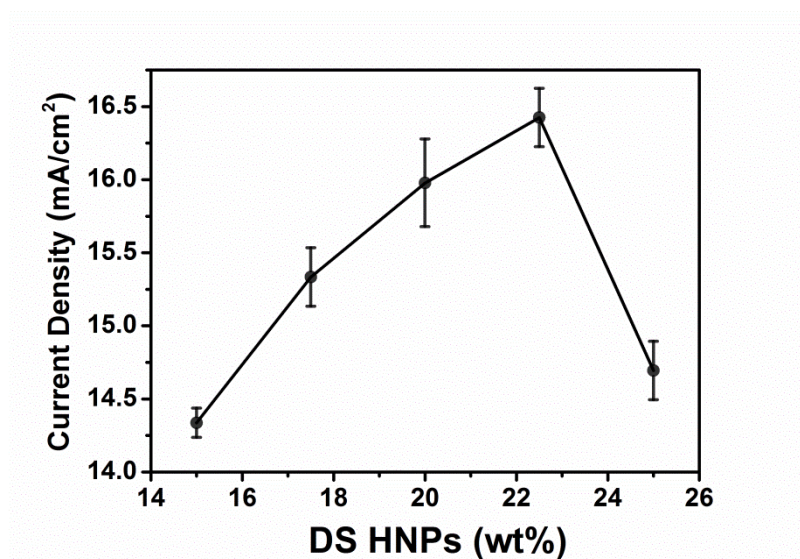

**Figure S1.** Current density ( $J_{SC}$ ) of the anode film as a function of DS HNP concentration (contents: 15-25 wt%) in the scattering layer.

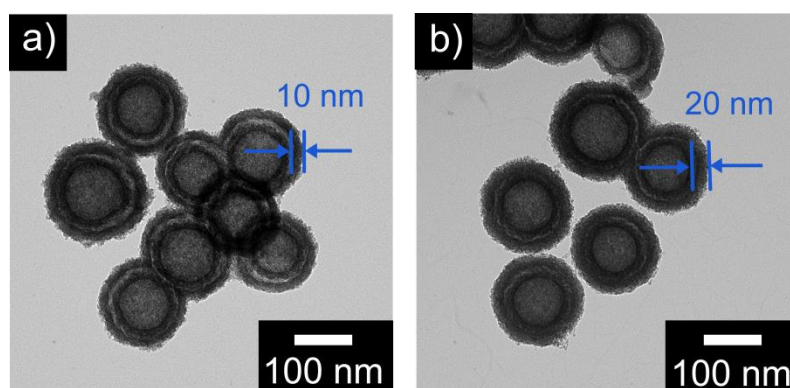

**Figure S2.** Transmission electron microscopy (TEM) images of 120-nm double shell hollow nanoparticles (DS HNPs) with a shell thickness of a) 10 nm and b) 20 nm.

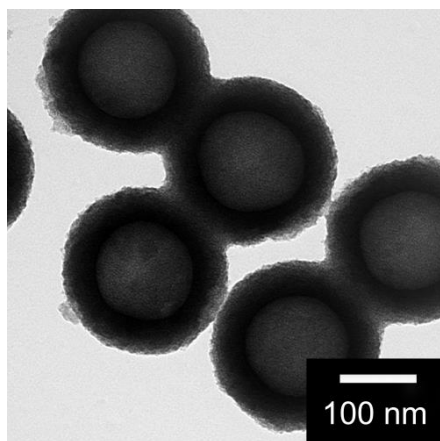

**Figure S3.** TEM images of single-shell HNPs (SS HNPs) 240 nm in size.

**Table S1.** Average and standard deviation of power conversion efficiency (PCE) of DSSCs employing TiO<sub>2</sub> NPs, SS HNPs, and DS HNPs as scattering layer. Same experiments were held 5 times.

| Sample               | 1 (%) | 2 (%) | 3 (%) | 4 (%) | 5 (%) | Ave <sup>a</sup> (%) | Dev <sup>b</sup> (%) |
|----------------------|-------|-------|-------|-------|-------|----------------------|----------------------|
| TiO <sub>2</sub> NPs | 6.58  | 6.35  | 6.36  | 6.37  | 7.10  | 6.6                  | 0.32                 |
| SS HNP               | 8.01  | 7.94  | 7.95  | 8.125 | 7.90  | 8.0                  | 0.09                 |
| DS HNP               | 8.4   | 8.58  | 8.25  | 8.4   | 8.40  | 8.4                  | 0.12                 |

a : Average of power conversion efficiency ( $\eta$ ) of each materials. b : Standard deviation ( $\sigma$ ) of power conversion efficiency for every experiments conducted.
